# Supplementary material
Source: Springer Nature journal article supplement (https://www.springermedizin.de/resource/supplementary/12888_2011_981_MOESM1_ESM.pdf/9479562)
Supplement: MOESM1 [file 9479562]

Consecutive attendees at low vision services in SE Wales and London (n=1000)

All complete routine **pre assessment questionnaire** which includes: 7 item NEI VFQ & GDS-15. An additional brief information sheet about the study will be included.

GDS score of 6 or more  
(n=300)

GDS score of less than 6  
(n=700) routine low vision  
assessment

### Low Vision Assessment (LVA)

All are given detailed information about the study (orally and in writing) and copies of the questionnaires (7 item NEI VFQ, near subscale VFQ-48, BDI-II, EQ-5D, ICECAP & CSRI) that will form the basis of the baseline telephone interview.

INFORMED CONSENT OBTAINED (n=100)

Baseline biographical information extracted from participant's notes

Those scoring 2 or 3 on the suicidal ideation scale (BDI-II) will be referred to GP and will not take part in the trial.

### **BASELINE TELEPHONE INTERVIEW**

(within 1 week)

7 item NEI VFQ +VFQ-48 near subscale, BDI-II & EQ-5D, CSRI, ICECAP, Cognitive Screen (referral for medication evaluation for those with a score of 29 or more on the BDI-II) then,

### **RANDOMISATION**

#### **“LETTER”**

Within 2 weeks: Letter to the GP informing him / her of GDS score

#### **“PST”**

Within 2 weeks: Problem-solving treatment begins

#### **“CONTROL”**

After 6 weeks: follow up LVA (n=34)

After 6 weeks: follow up LVA (n=34)

After 6 weeks: follow up LVA (n=34)

After 3 months: (n=31)  
Telephone interview: VFQs, BDI-II, ICECAP & EQ-5D

After 3 months: (n=31)  
Telephone interview: VFQs, BDI-II, ICECAP & EQ-5D

After 3 months: (n=31)  
Telephone interview: VFQs, BDI-II, ICECAP & EQ-5D

After 6 months: (n=24)  
Telephone interview: VFQs, BDI-II, EQ-5D, ICECAP, CSRI & GDS-15  
Letter to GP informing him / her of GDS score

After 6 months: (n=24)  
Telephone interview: VFQs, BDI-II, EQ-5D, ICECAP, CSRI & GDS-15  
Questions about outcome of referral and acceptability of this intervention

After 6 months: (n=24)  
Telephone interview: VFQs, BDI-II, EQ-5D, ICECAP, CSRI & GDS-15  
Questions about acceptability of PST intervention

After 9 months  
Questions about outcome of referral and acceptability of this intervention & GDS-15

Participants still screening positive for depression (GDS-15) will be offered a GP referral.  
All participants thanked for their involvement in study and feedback on study provided.
